# Supplementary material
Source: PubMed Central journal article supplement (PMC149947)

# Protein synthesis

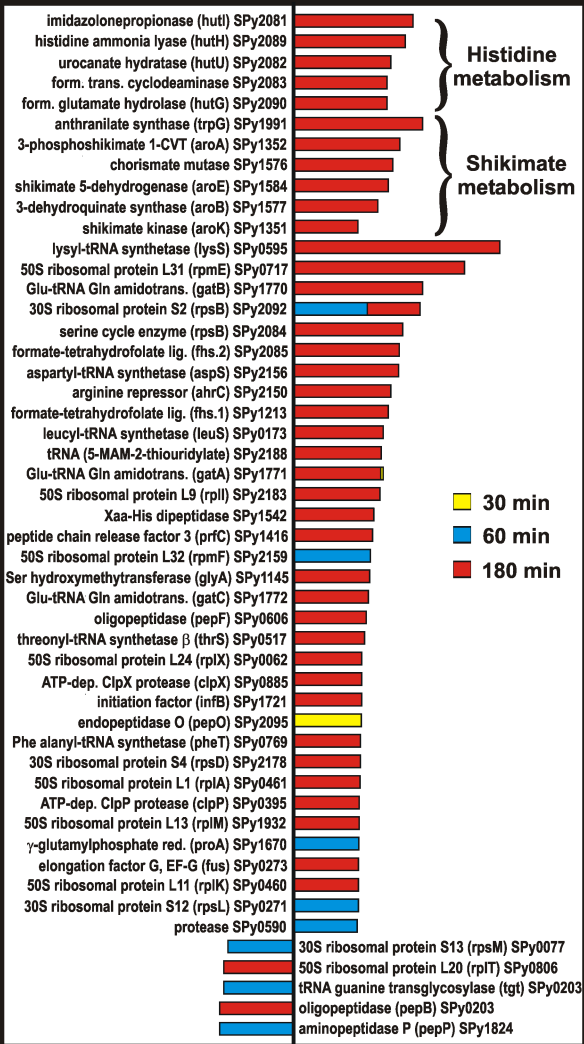

# Miscellaneous

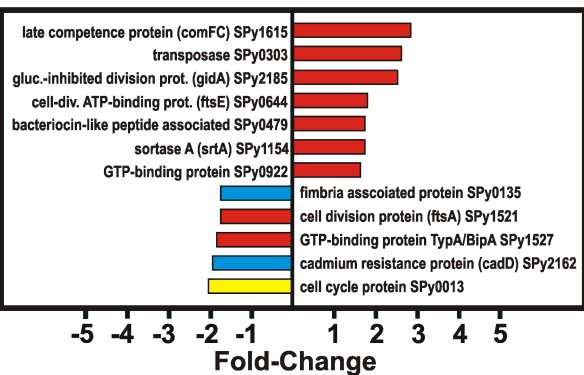

-5 -4 -3 -2 -1 1 2 3 4 5

Fold-Change

Supplement: pnas_0337370100_4.pdf [file pnas_0337370100_4.pdf]

## Transporters

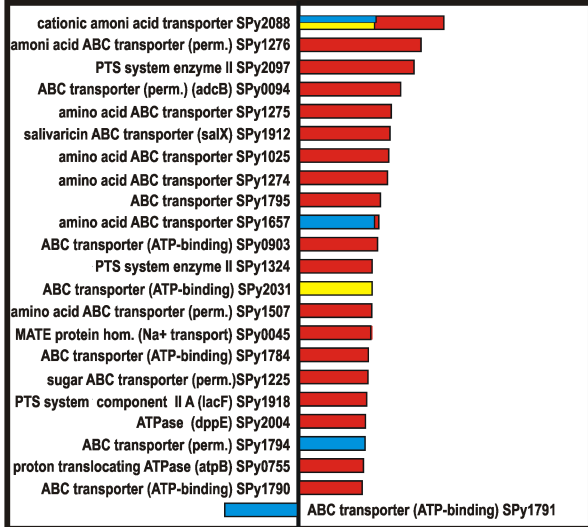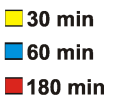

## Nucleotide synthesis and metabolism

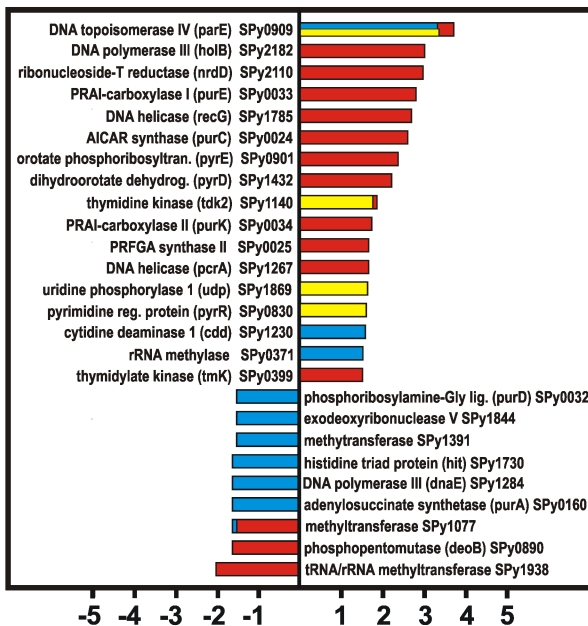

## Energy Metabolism

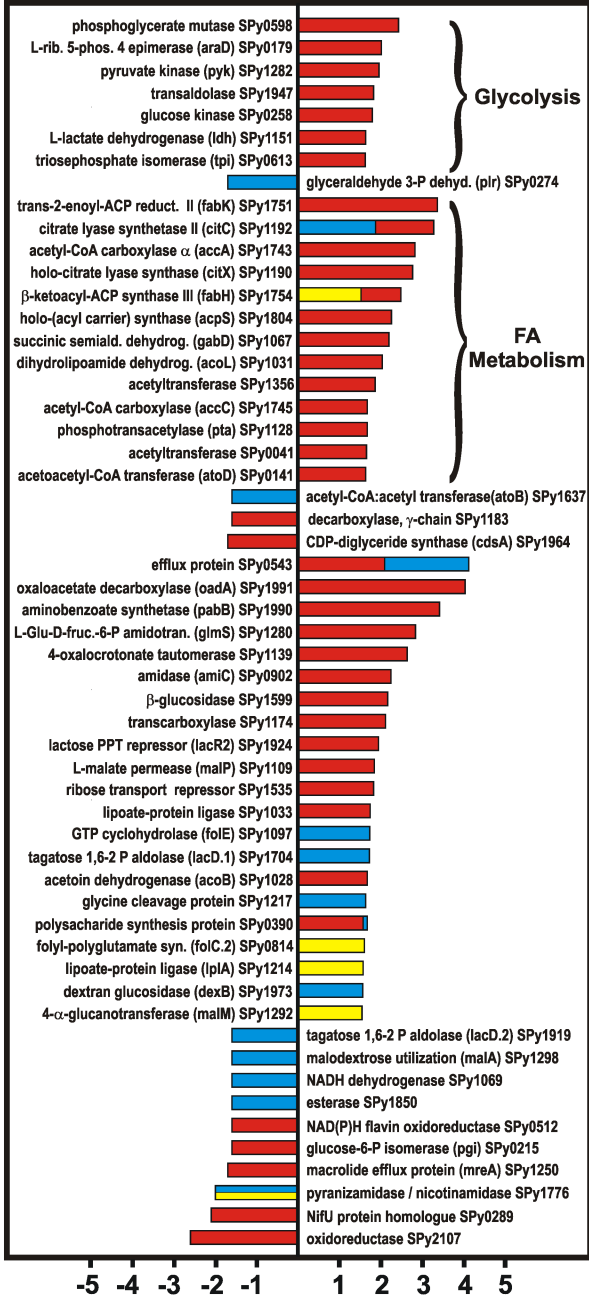

Fold-Change

Supplement: pnas_0337370100_5.pdf [file pnas_0337370100_5.pdf]
